1 **Title: One prophage WO gene rescues cytoplasmic incompatibility in *Drosophila melanogaster***

2

3 **Authors: J. Dylan Shropshire<sup>1\*</sup>, Jungmin On<sup>1</sup>, Emily M. Layton<sup>1</sup>, Helen Zhou<sup>1</sup>, and Seth R.**

4 **Bordenstein<sup>1,2,3,4\*</sup>**

5

6 <sup>1</sup>Department of Biological Sciences, Vanderbilt University, Nashville, TN 37235, USA

7 <sup>2</sup>Department of Pathology, Microbiology, and Immunology, Vanderbilt University, Nashville, TN 37235,

8 USA

9 <sup>3</sup>Vanderbilt Genetics Institute, Vanderbilt University, Nashville, TN 37235, USA

10 <sup>4</sup>Vanderbilt Institute of Infection, Immunology and Inflammation, Vanderbilt University, Nashville, TN

11 37235, USA

12 \*Correspondence to:

13 J. Dylan Shropshire, Nashville, TN, 37235, Phone 423.930.6292, e-mail [dylan.shropshire@vanderbilt.edu](mailto:dylan.shropshire@vanderbilt.edu)

14 Seth R. Bordenstein, Nashville, TN, 37235, Phone 615.322.9087, e-mail [s.bordenstein@vanderbilt.edu](mailto:s.bordenstein@vanderbilt.edu)

15

16 Mobile Title: *cifA* rescues cytoplasmic incompatibility

17

18 ORCID iD: J. Dylan Shropshire (<https://orcid.org/0000-0003-4221-2178>), Seth R. Bordenstein

19 (<https://orcid.org/0000-0001-7346-0954>)

20 Keywords: cytoplasmic incompatibility, rescue, *Wolbachia*, prophage WO, *Drosophila melanogaster*

21

22 **Abstract:** *Wolbachia* are maternally-inherited, intracellular bacteria at the forefront of vector control  
23 efforts to curb arbovirus transmission. In international field trials, the cytoplasmic incompatibility (CI)  
24 drive system of wMel *Wolbachia* is deployed to replace target vector populations, whereby a *Wolbachia*-  
25 induced modification of the sperm genome kills embryos. However, *Wolbachia* in the embryo rescue the  
26 sperm genome impairment, and therefore CI results in a strong fitness advantage for infected females  
27 that transmit the bacteria to offspring. The two genes responsible for the wMel-induced sperm  
28 modification of CI, *cifA* and *cifB*, were recently identified in the eukaryotic association module of prophage  
29 WO, but the genetic basis of rescue is unresolved. Here we use transgenic and cytological approaches to  
30 demonstrate that *cifA* independently rescues CI and nullifies embryonic death caused by wMel *Wolbachia*  
31 in *Drosophila melanogaster*. Discovery of *cifA* as the rescue gene and previously one of two CI induction  
32 genes establishes a new ‘Two-by-One’ model that underpins the genetic basis of CI. Results highlight the  
33 central role of prophage WO in shaping *Wolbachia* phenotypes that are significant to arthropod evolution  
34 and vector control.

35

36 **Significance Statement:** The World Health Organization recommended pilot deployment of *Wolbachia*-  
37 infected mosquitoes to curb viral transmission to humans. Releases of mosquitoes are underway  
38 worldwide because *Wolbachia* can block replication of these pathogenic viruses and deterministically  
39 spread by a drive system termed cytoplasmic incompatibility (CI). Despite extensive research, the  
40 underlying genetic basis of CI remains only half-solved. We recently reported that two prophage WO  
41 genes recapitulate the modification component of CI in a released strain for vector control. Here we show  
42 that one of these genes underpins rescue of CI. Together, our results reveal the complete genetic basis of  
43 this selfish trait and pave the way for future studies exploring WO prophage genes as adjuncts or  
44 alternatives to current control efforts.

45 \body

46

47 **Introduction:**

48 *Wolbachia* are an archetype of maternally-inherited, intracellular bacteria. They occur in an  
49 estimated 40-52% of arthropod species (1, 2) and 47% of the Onchocercidae family of filarial nematodes  
50 (3), making them the most widespread bacterial symbiont in the animal kingdom (2). In arthropods,  
51 *Wolbachia* mainly reside in the cells of the reproductive tissues, transmit transovarially (4), and often  
52 commandeer host fertility, sex ratios, and sex determination to enhance their maternal transmission via  
53 male-killing, feminization, parthenogenesis, or cytoplasmic incompatibility (CI) (5, 6).

54 Discovered nearly half a century ago (7), *Wolbachia*-induced CI is the most common reproductive  
55 modification and results in embryonic lethality when an infected male mates with an uninfected female,  
56 but this lethality is rescued when the female is likewise infected (8). As such, rescue provides a strong  
57 fitness advantage to infected females, the transmitting sex of *Wolbachia* (9-11). Alone, CI-induced  
58 lethality is deployed in vector control studies to crash the resident uninfected mosquito population  
59 through release of *Wolbachia*-infected males (12-17). Together, CI-induced lethality and rescue constitute  
60 a microbial drive system that is used in field studies worldwide to stably replace an uninfected mosquito  
61 population with an infected one via release of male and females harboring *wMel Wolbachia* (18), which  
62 confer resistance against dengue and Zika viruses (19, 20). The efficacy of this drive system for spreading  
63 *Wolbachia* in target populations critically depends on *Wolbachia's* ability to rescue its own lethal  
64 modification of the sperm.

65 While CI is gaining momentum as a natural, sustainable, and inexpensive tool for vector control,  
66 the genes that underpin this microbial adaptation are not fully known. Our previous screen of *Wolbachia*  
67 genomes and transcriptomes from infected ovaries identified two adjacent genes, *cifA* and *cifB*, from the  
68 *wMel* strain in *Drosophila melanogaster* as the only genes consistently associated with CI (21). These two

69 genes occur in the eukaryotic association module of prophage WO (22), and they together recapitulate CI  
70 when dually expressed in uninfected male flies (21, 23). Each gene alone is incapable of inducing CI (21),  
71 and the rescue gene remains unknown. As *cifA* and *cifB* are the only two wMel genes associated with CI,  
72 we previously hypothesized that the CI induction and rescue genes might be the same (21). Here we test  
73 the hypothesis that transgenic expression of *cifA* and/or *cifB* genes from wMel *Wolbachia* in ovaries can  
74 rescue CI and nullify the associated embryonic defects in *D. melanogaster*.

75

## 76 **Results and Discussion:**

77 Since *Wolbachia* cannot be genetically transformed, we first tested the ability of *cifA* to  
78 transgenically rescue wild type CI using a GAL4-UAS system for tissue-specific expression in uninfected *D.*  
79 *melanogaster* females. As such, we conducted the transgenic experiments under the control of either *nos*-  
80 GAL4-*tubulin* in uninfected germline stem cells or maternal triple driver, MTD-GAL4, to drive higher  
81 transgene expression throughout oogenesis. In transcriptomes of wMel-infected *D. melanogaster*, *cifA* is  
82 a highly expressed prophage WO gene (24). MTD-GAL4 utilizes two *nos*-GAL4 driver variants (including  
83 *nos*-GAL4-*tubulin*) and an ovarian tumor driver (25). Control CI and rescue crosses with either driver  
84 yielded the expected hatching rates. Crosses between infected males and uninfected females expressing  
85 *cifA* under the control of MTD-GAL4 showed a markedly significant increase in embryonic hatching relative  
86 to *cifA* expression under *nos*-GAL4-*tubulin* and at levels similar to that in control rescue crosses (Fig. 1A).  
87 These results are consistent with complete rescue of CI by *cifA*, in association with increased expression  
88 throughout the developing egg chambers. Similar results with *nos*-GAL4-*tubulin* expression in uninfected  
89 ovarian germline stem cells resulted in a small increase in hatch rate that was inconsistently significant  
90 among replicates (Fig. S1). An analysis of *cifA* gene expression reveals MTD-GAL4 associates with a three-

91 order-of-magnitude increase over *nos*-GAL4-*tubulin*, supporting strength of expression as a factor for  
92 rescue (Fig. 1B).

93 We expanded our evaluation of *cif* gene expression under the control of MTD-GAL4 in uninfected  
94 females to test if *cifB* alone or in combination with *cifA* impacts CI penetrance. As expected, infected  
95 males crossed to either uninfected females or females transgenically expressing *cifB* under MTD-GAL4  
96 yielded similar CI penetrance (Fig. 2). These results suggest that *cifB* does not rescue CI when  
97 transgenically expressed in the ovaries, and its CI-related function is specific to testes. In contrast, MTD-  
98 GAL4 expression of *cifA*, by itself or in combination with *cifB*, significantly rescued CI to levels comparable  
99 to rescue by infected females (Fig. 2). These results are consistent with *cifA* independently functioning as  
100 the rescue factor and suggest that *cifB* does not inhibit *cifA*'s ability to rescue CI. As *Wolbachia* can induce  
101 phenotypes known to bias sex ratios, we collected the surviving offspring from the transgenic and control  
102 rescue crosses and sexed them to demonstrate normal sex ratios, indicating that rescue was not sex-  
103 specific (Fig. S2).

104 Next, we tested if the canonical cytological defects observed in early CI embryos (early mitotic  
105 failure, chromatin bridging, and regional mitotic failure (26)) were nullified under *cifA*-induced rescue. We  
106 examined embryos from control and transgenic crosses after 1-2 h of development and binned their  
107 cytology into one of five phenotypes as previously established for *D. melanogaster* CI (21). Nearly half of  
108 CI-induced lethality in embryos is the result of embryonic arrest during advanced developmental stages  
109 in Dipteran species (27-30). As expected, the control CI cross yielded high levels of all three CI-associated  
110 defects, and the embryos from the control rescue cross developed with significantly fewer abnormalities  
111 (Fig. 3). MTD-GAL4 transgene expression of *cifA* in uninfected females, either alone or dually expressed  
112 with *cifB*, resulted in significantly fewer cytological defects (Fig. 3). These effects were not seen with  
113 transgene *cifB* expression, again validating that *cifA* alone can recapitulate wild type rescue by *Wolbachia*.

114           These data are in contrast with previous work reporting the inability to transgenically rescue CI in  
115 *D. melanogaster* (23); however, there are three critical differences between the studies. First, *wPip*'s  
116 homologs from *Culex pipiens* were used in the prior work instead of *wMel*'s *cif* genes from *D.*  
117 *melanogaster* here. Thus, differences in host background interactions could explain the discrepancy.  
118 Second, a T2A sequence for the *wPip* gene homologs was used to allow for bicistronic expression, but  
119 ribosome skipping results in a C-terminal sequence extension to the first protein and a proline addition to  
120 the second protein that generates sequence artifacts and could alter function (31). Finally, different  
121 insertion sites are capable of different levels of expression due to their local chromatin environment (32),  
122 thus the chosen sites may produce insufficient product to cause rescue, as was the case in our study when  
123 *cifA* was driven by *nos-GAL4-tubulin*.

124           *cifA* encodes a putative catalase-rel function, sterile-like transcription factor (STE) domains, and a  
125 domain of unknown function (DUF3243) that shares homology with a putative Puf-family RNA binding  
126 domain in *cifA*-like homologs (33), whereas *cifB* has nuclease and deubiquitilase domains (23, 33). Only  
127 the deubiquitilase annotation has been functionally tested and confirmed(23). Based on subcellular  
128 localization (PSORTb) and transmembrane helix predictors (TMbase), CifA is a cytoplasmic protein without  
129 transmembrane helices (Fig. S3). Codon-based and Fisher's exact tests of neutrality demonstrate that  
130 closely-related (76.2-99.8% pairwise nucleotide identity) Type I CifA homologs (21) largely evolve by  
131 purifying selection (Fig. S4a, b), and sliding window analyses (SWAKK and JCoDA) reveal that purifying  
132 selection is strongest on the catalase-rel domain and the unannotated region at the N-terminus, with  
133 considerably weaker purifying selection on the putative DUF3243 and STE domains (Fig. 4; Fig. S4c). This  
134 is supported by prior work reporting stronger amino acid conservation within the Type I CifA N-terminus  
135 relative to the C-terminus (33).

136           These findings illustrate that the *Wolbachia* prophage WO gene *cifA* recapitulates rescue of wild  
137 type CI. As *cifA* is one of two genes involved in induction of CI, results support the hypothesis that a gene

138 involved in CI induction is also the rescue gene (21). In addition, transgenic expression of *cifA* in yeast  
139 inhibits a temperature-dependent growth defect caused by *cifB* expression (23). The discovery that CI is  
140 induced by *cifA* and *cifB* and rescued by *cifA* motivates a new modification-rescue model of CI where two  
141 genes act as the CI modification factors (in the male), and one of these same genes acts as the rescue  
142 factor (in the female). This ‘Two-by-One’ model posits that each strain of *Wolbachia* has its own set of  
143 *cifA*- and *cifB*-associated CI modifications and one *cifA* rescue factor. The different roles of *cifA* in CI and  
144 rescue is intriguing. We predict that the function of *cifA* is dependent on differential tissue localization of  
145 gene products in male and female reproductive systems and/or alternate post-translational modification  
146 in testes/sperm (CI) versus in ovaries/embryoes (rescue). Moreover, one could speculate that the putative  
147 antioxidant catalase-rel domain of the CifA protein acts as a functional switch in the presence of reactive  
148 oxygen species, known to be higher in *Wolbachia*-infected testes (34), whereas the Puf-family RNA binding  
149 domain and STE are involved in RNA binding and transcriptional (mis)regulation of an unknown host  
150 factor.

151           It has been hypothesized that divergence in modification and rescue genes leads to bidirectional  
152 CI (21, 37, 38), which is a reciprocal incompatibility between males and females infected with different  
153 *Wolbachia* strains (7, 39-42). Comparative genomic analyses of *cifA* and *cifB* genes reveal extremely high  
154 levels of amino acid divergence (21), strong codivergence (21, 33), and recombination (38), consistent  
155 with the very rapid evolution of bidirectional CI across *Wolbachia* that can contribute to reproductive  
156 isolation and speciation (42, 43). Indeed, divergence of the *cifA* and *cifB* genes into several phylogenetic  
157 types correlates with bidirectional CI patterns in *Drosophila* and *Culex* (21, 38). There are at least two  
158 explanations for how simple genetic changes in these genes can contribute to bidirectional CI. First, a  
159 single mutation in the *cifA* gene could produce variation in the modification and rescue components that  
160 render two *Wolbachia* strains incompatible. For instance, given an ancestral and derived allele of *cifA*,  
161 males and females with *Wolbachia* carrying the same *cifA* allele are compatible; however, males with

162 *Wolbachia* carrying the ancestral *cifA* allele cause a sperm modification that is unable to be rescued by  
163 embryos with *Wolbachia* carrying the derived *cifA* allele, and vice versa. Thus, a single mutation in *cifA*  
164 alone can enable the switch from being compatible to incompatible *Wolbachia*. Second, mutations in both  
165 *cifA* and *cifB* are required for the evolution of bidirectional CI. For example, CifA-CifB protein binding (23)  
166 and/or differential localization in the sperm and egg may underpin bidirectional CI between *Wolbachia*  
167 strains. In this model, amino acid divergence in the Cif proteins may contribute to weakened binding,  
168 which in turn yields *Wolbachia* strains incapable of CI but capable of rescuing the ancestral variant (44,  
169 45). A compensatory substitution in the other Cif protein could in theory restore binding and yield  
170 bidirectional incompatibility with the ancestral Cif variants. Codivergence between amino acid sequences  
171 of these proteins is consistent with this model. Under both models, the presence of multiple WO  
172 prophages carrying *cifA* genes may also promote incompatibilities through the production of multiple CI  
173 product complexes simultaneously (21). In support of these hypotheses, complex diversification and  
174 duplication of *cifA* and *cifB* has been reported in *Drosophila* and *C. pipiens* that harbor a variety of  
175 incompatible *Wolbachia* strains (21, 38).

176 In conclusion, our findings reveal the connected genetic basis of CI and rescue and highlight the  
177 fundamental impact of prophage genes on the adaptive phenotypes of an obligate intracellular bacteria.  
178 In addition to genetically dissecting this widespread form of reproductive parasitism and microbial drive,  
179 we also establish a new, Two-by-One model to explain the modification and rescue components of CI.  
180 Finally, beneficial applications of CI and rescue genes as transgenic drive constructs may be possible as  
181 adjuncts or alternatives to pest control or vector control strategies currently deploying *Wolbachia*-  
182 infected mosquitoes (15-18).

183

184



185 **Materials and Methods:**

186 **Fly rearing and strains.** *D. melanogaster* stocks  $y^1w^*$  (BDSC 1495), *nos-GAL4-tubulin* (BDSC 4442),  
187 MTD-GAL4 (containing *nos-GAL4-tubulin*, *nos-GAL4-VP16*, and *otu-GAL4-VP16*; BDSC 31777), and UAS  
188 transgenic lines homozygous for *cifA*, *cifB*, and *cifA;B* (21) were maintained at 12:12 light:dark at 25 ° C  
189 and 70% relative humidity (RH) on 50 ml of a standard media. GAL4 lines were found to be infected with  
190 *wMel Wolbachia*, and uninfected lines were produced through tetracycline treatment as previously  
191 described (21). Infection status was frequently confirmed via PCR using WolbF and WolbR3 primers (46).  
192 During virgin collections, flies were stored at 18 ° C overnight to slow eclosion rate, and virgin flies were  
193 kept at room temperature.

194 **Hatch rate and sex ratio assays.** Virgin MTD-GAL4 females were collected for the first 3 days of  
195 emergence and aged 9-11 days before crossing to non-virgin homozygous UAS (*cifA*, *cifB*, or *cifA;B*) males.  
196 The start of collections for the maternal and paternal lineages were staggered by 7 days. Single pair  
197 matings occurred in an 8 oz bottle, and a grape-juice agar plate was smeared with yeast and affixed to the  
198 opening with tape. The flies and bottles were then stored at 25 ° C and 70% RH for 24 h at which time the  
199 plates were replaced with freshly smeared plates and again stored for 24 h. Plates were then removed  
200 and the number of embryos on each plate were counted and stored. After 30 h the remaining unhatched  
201 embryos were counted (Extended Data Fig. 6). The hatch rate was calculated by dividing the number of  
202 hatched embryos by the initial embryo count and multiplying by 100. Hatch rate was plotted against clutch  
203 size for all rescue crosses conducted in this study to reveal a significant correlation (Fig. S5), and a  
204 threshold clutch size for analysis was set equal to exclusion of 99% of plates with a hatch rate of 0 for each  
205 genotype (31 for *nos-GAL4-tubulin* and 48 for MTD-GAL4). Larvae were moved into vials of standard media  
206 and the offspring sex ratio determined after 15-18 days (Fig. S6). Hatch rates testing MTD-GAL4 or *nos-*  
207 *GAL4-tubulin* expression of *cifA* were conducted three and four times respectively. Sex ratio experiments  
208 were conducted once.

209           **Gene expression.** To compare the level of UAS-*cifA* expression between MTD-GAL4 and *nos*-GAL4-  
210 *tubulin* flies, mothers from hatch rate assays were collected after the allotted laying period, abdomens  
211 were immediately dissected, and samples were frozen in liquid nitrogen and stored at -80C until  
212 processing. RNA was extracted using the Direct-zol RNA MiniPrep Kit (Zymo), DNase treated with DNA-  
213 free (Ambion, Life Technologies), and cDNA was generated with SuperScript VILO (Invitrogen).  
214 Quantitative PCR was performed on a Bio-Rad CFX-96 Real-Time System using iTaq Universal SYBR Green  
215 Supermix (Bio-Rad). Forty cycles of PCR were performed against positive controls (extracted DNA),  
216 negative controls (water), RNA, and cDNA with the following conditions: 50 °C 10 min, 95 °C 5 min, 40×  
217 (95 °C 10 s, 55 °C 30 s), 95 °C 30 s. Primers used were *cifA* opt and Rp49 forward and reverse (Table S1).  
218 Fold expression of UAS-*cifA* relative to the *D. melanogaster* house-keeping gene Rp49 was determined  
219 with  $2^{-\Delta\Delta Ct}$ . This experiment and corresponding hatch rate were performed once.

220           **Embryo cytology.** Flies were collected as described for the hatch rate assays, but with 60 females  
221 and 12 males in each bottle with a grape-juice agar plate attached. All flies used were siblings of those  
222 from the hatch rate, grape-juice plates replaced as described above, and embryos collected in parallel to  
223 egg-laying by hatch rate females. Embryos were collected, dechorionated, washed, methanol fixed,  
224 stained with propidium iodide, imaged, and categorized as previously described (21) (Fig. S6). This  
225 experiment was performed once.

226           **Putative *cifA* localization.** The PSORTb v3.0.2 web server (47) was used to predict subcellular  
227 localization of the *wMel* CifA protein to either the cytoplasm, cytoplasmic membrane, periplasm, outer  
228 membrane, or extracellular space. A localization score is provided for each location with scores of 7.5 or  
229 greater considered probable localizations. The TMpred web server (48) was used to predict  
230 transmembrane helices in *wMel* CifA. TMpred scores were generated for transmembrane helices  
231 spanning from inside-to-outside (i-o) and outside-to-inside (o-i), and scores above 500 are considered  
232 significant.

233           ***cifA selection analyses.*** Selection analyses were conducted using four independent tests of  
234 selection: codon-based Z-test of neutrality (49), Fisher’s exact test of neutrality (49), Sliding Window  
235 Analysis of Ka and Ks (SWAKK) (50), and Java Codon Delimited Alignment (JCoDA) (51). The first two  
236 analyses were conducted using the MEGA7 desktop app with a MUSCLE translation alignment generated  
237 in Geneious v5.5.9. The SWAKK 2.1 web server and the JCoDA v1.4 desktop app were used to analyze  
238 divergence between *wMel* and *wHa cifA* with a sliding window of 25 or 50 codons and a jump size of 1  
239 codon for SWAKK and 5 codons for JCoDA.

240           ***Statistical analyses.*** All statistical analyses were conducted in GraphPad Prism (Prism 7 or online  
241 tools). Hatch rate and sex ratio statistical comparisons were made using Kruskal-Wallis followed by a  
242 Dunn’s multiple comparison test. Expression was compared using a Mann-Whitney test. Correlations  
243 between hatch rate and clutch size were determined using Spearman rho. Pair-wise chi-square analyses  
244 were used for cytology studies to compare defective and normal embryos followed by generation of  
245 Bonferroni adjusted p-values. An unpaired t-test was used for statistical comparison of RNA fold  
246 expression. All p-values are reported in Table S2.

247           ***Data availability.*** All source data and replicate data are available as Supplementary Information  
248 along with this publication.

249

250

251 **Acknowledgments:** This work was supported by National Institutes of Health (NIH) awards R01  
252 AI132581 and R21 HD086833 to S.R.B., National Science Foundation award IOS 1456778 to S.R.B., and a  
253 National Science Foundation Graduate Research Fellowship to J.D.S. Any opinion, findings, and  
254 conclusions or recommendations expressed in this material are those of the authors(s) and do not  
255 necessarily reflect the views of the National Institutes of Health or the National Science Foundation.  
256 Imaging was performed in part using the Vanderbilt University Medical Center Cell Imaging Shared  
257 Resources (supported by NIH grants CA68485, DK20593, DK58404, DK59637 and EY08126). We thank  
258 Daniel LePage for preliminary work, Sarah R. Bordenstein and Jessamyn Perlmutter for manuscript  
259 preparation, and Jared Nordman for kindly providing the MTD-GAL4 line.

260

261

262 **References:**

- 263 1. Weinert LA, Araujo-Jnr EV, Ahmed MZ, & Welch JJ (2015) The incidence of bacterial  
264 endosymbionts in terrestrial arthropods. *Proc Biol Sci* 282(1807):20150249.
- 265 2. Zug R & Hammerstein P (2012) Still a host of hosts for *Wolbachia*: analysis of recent data  
266 suggests that 40% of terrestrial arthropod species are infected. *PLoS One* 7(6):e38544.
- 267 3. Ferri E, *et al.* (2011) New insights into the evolution of *Wolbachia* infections in filarial nematodes  
268 inferred from a large range of screened species. *PLoS One* 6(6):e20843.
- 269 4. Frydman HM, Li JM, Robson DN, & Wieschaus E (2006) Somatic stem cell niche tropism in  
270 *Wolbachia*. *Nature* 441(7092):509-512.
- 271 5. Werren JH, Baldo L, & Clark ME (2008) *Wolbachia*: master manipulators of invertebrate biology.  
272 *Nat Rev Microbiol* 6(10):741-751.
- 273 6. LePage D & Bordenstein SR (2013) *Wolbachia*: Can we save lives with a great pandemic? *Trends*  
274 *in parasitology* 29(8):385-393.
- 275 7. Yen J & Barb A (1973) The etiological agent of cytoplasmic incompatibility in *Culex pipiens*.  
276 *Journal of Invertebrate Pathology* 22.
- 277 8. Serbus LR, Casper-Lindley C, Landmann F, & Sullivan W (2008) The genetics and cell biology of  
278 *Wolbachia*-host interactions. *Annu Rev Genet* 42:683-707.
- 279 9. Turelli M & Hoffmann AA (1999) Microbe-induced cytoplasmic incompatibility as a mechanism  
280 for introducing transgenes into arthropod populations. *Insect Mol Biol* 8(2):243-255.
- 281 10. Hancock PA, Sinkins SP, & Godfray HC (2011) Strategies for introducing *Wolbachia* to reduce  
282 transmission of mosquito-borne diseases. *PLoS Negl Trop Dis* 5(4):e1024.
- 283 11. Hancock PA, Sinkins SP, & Godfray HC (2011) Population dynamic models of the spread of  
284 *Wolbachia*. *Am Nat* 177(3):323-333.
- 285 12. Atyame CM, *et al.* (2011) Cytoplasmic incompatibility as a means of controlling *Culex pipiens*  
286 *quinquefasciatus* mosquito in the islands of the south-western Indian Ocean. *PLoS Negl Trop Dis*  
287 5(12):e1440.
- 288 13. Dobson SL, Bordenstein SR, & Rose RI (2016) *Wolbachia* mosquito control: Regulated. *Science*  
289 352(6285):526-527.
- 290 14. O'Connor L, *et al.* (2012) Open release of male mosquitoes infected with a *Wolbachia*  
291 biopesticide: field performance and infection containment. *PLoS Negl Trop Dis* 6(11):e1797.
- 292 15. Zhang D, Zheng X, Xi Z, Bourtzis K, & Gilles JR (2015) Combining the sterile insect technique with  
293 the incompatible insect technique: I-impact of *Wolbachia* infection on the fitness of triple- and  
294 double-infected strains of *Aedes albopictus*. *PLoS One* 10(4):e0121126.
- 295 16. Ritchie SA, Townsend M, Paton CJ, Callahan AG, & Hoffmann AA (2015) Application of wMelPop  
296 *Wolbachia* strain to crash local populations of *Aedes aegypti*. *PLoS Negl Trop Dis* 9(7):e0003930.
- 297 17. Zabalou S, *et al.* (2004) *Wolbachia*-induced cytoplasmic incompatibility as a means for insect  
298 pest population control. *Proc Natl Acad Sci U S A* 101(42):15042-15045.
- 299 18. Hoffmann AA, *et al.* (2014) Stability of the wMel *Wolbachia* infection following invasion into  
300 *Aedes aegypti* populations. *PLoS Negl Trop Dis* 8(9):e3115.
- 301 19. Walker T, *et al.* (2011) The wMel *Wolbachia* strain blocks dengue and invades caged *Aedes*  
302 *aegypti* populations. *Nature* 476(7361):450-453.
- 303 20. Dutra HL, *et al.* (2016) *Wolbachia* blocks currently circulating Zika virus isolates in Brazilian  
304 *Aedes aegypti* mosquitoes. *Cell Host Microbe* 19(6):771-774.
- 305 21. LePage DP, *et al.* (2017) Prophage WO genes recapitulate and enhance *Wolbachia*-induced  
306 cytoplasmic incompatibility. *Nature* 543(7644):243-247.

- 307 22. Bordenstein SR & Bordenstein SR (2016) Eukaryotic association module in phage WO genomes  
308 from *Wolbachia*. *Nat Commun* 7:13155.
- 309 23. Beckmann JF, Ronau JA, & Hochstrasser M (2017) A *Wolbachia* deubiquitylating enzyme induces  
310 cytoplasmic incompatibility. *Nat Microbiol* 2:17007.
- 311 24. Gutzwiller F, *et al.* (2015) Dynamics of *Wolbachia* pipientis Gene Expression Across the  
312 *Drosophila melanogaster* Life Cycle. *G3 (Bethesda)* 5(12):2843-2856.
- 313 25. Staller MV, *et al.* (2013) Depleting gene activities in early *Drosophila* embryos with the  
314 "maternal-Gal4-shRNA" system. *Genetics* 193(1):51-61.
- 315 26. Landmann F, Orsi GA, Loppin B, & Sullivan W (2009) *Wolbachia*-mediated cytoplasmic  
316 incompatibility is associated with impaired histone deposition in the male pronucleus. *PLoS*  
317 *Pathog* 5(3):e1000343.
- 318 27. Lassy CW & Karr TL (1996) Cytological analysis of fertilization and early embryonic development  
319 in incompatible crosses of *Drosophila simulans*. *Mechanisms of development* 57(1):47-58.
- 320 28. Callaini G, Riparbelli MG, Giordano R, & Dallai R (1996) Mitotic defects associated with  
321 cytoplasmic incompatibility in *Drosophila simulans*. *Journal of Invertebrate Pathology* 67(1):55-  
322 64.
- 323 29. Wright JD & Barr AR (1981) *Wolbachia* and the normal and incompatible eggs of *Aedes*  
324 *polynesiensis* (Diptera: Culicidae). *Journal of Invertebrate Pathology* 38(3):409-418.
- 325 30. Duron O & Weill M (2006) *Wolbachia* infection influences the development of *Culex pipiens*  
326 embryo in incompatible crosses. *Heredity (Edinb)* 96(6):493-500.
- 327 31. Donnelly ML, *et al.* (2001) Analysis of the aphthovirus 2A/2B polyprotein 'cleavage' mechanism  
328 indicates not a proteolytic reaction, but a novel translational effect: a putative ribosomal 'skip'.  
329 *The Journal of general virology* 82(Pt 5):1013-1025.
- 330 32. Akhtar W, *et al.* (2013) Chromatin Position Effects Assayed by Thousands of Reporters  
331 Integrated in Parallel. *Cell* 154(4):914-927.
- 332 33. Lindsey ARI, *et al.* (2018) Evolutionary genetics of cytoplasmic incompatibility genes *cifA* and *cifB*  
333 in prophage WO of *Wolbachia*. *Genome biology and evolution* 10(2):435-451.
- 334 34. Brennan LJ, Haukedal JA, Earle JC, Keddie B, & Harris HL (2012) Disruption of redox homeostasis  
335 leads to oxidative DNA damage in spermatocytes of *Wolbachia*-infected *Drosophila simulans*.  
336 *Insect Mol Biol* 21(5):510-520.
- 337 35. Penz T, *et al.* (2012) Comparative genomics suggests an independent origin of cytoplasmic  
338 incompatibility in *Cardinium hertigii*. *PLoS Genet* 8(10):e1003012.
- 339 36. Mann E, *et al.* (2017) Transcriptome Sequencing Reveals Novel Candidate Genes for *Cardinium*  
340 *hertigii*-Caused Cytoplasmic Incompatibility and Host-Cell Interaction. *mSystems* 2(6).
- 341 37. Charlat S, Calmet C, & Mercot H (2001) On the mod resc model and the evolution of *Wolbachia*  
342 compatibility types. *Genetics* 159(4):1415-1422.
- 343 38. Bonneau M, *et al.* (2018) *Culex pipiens* crossing type diversity is governed by an amplified and  
344 polymorphic operon of *Wolbachia*. *Nature Communications* 9(1):319.
- 345 39. O'Neill SL & Karr TL (1990) bidirectional incompatibility between conspecific populations of  
346 *drosophila simulans*. *Nature* 348:178-180.
- 347 40. Bordenstein SR & Werren JH (2007) Bidirectional incompatibility among divergent *Wolbachia*  
348 and incompatibility level differences among closely related *Wolbachia* in *Nasonia*. *Heredity*  
349 99(3):278-287.
- 350 41. Poinot D, Bourtzis K, Markakis G, Savakis C, & Mercot H (1998) *Wolbachia* transfer from  
351 *Drosophila melanogaster* into *D. simulans*: Host effect and cytoplasmic incompatibility  
352 relationships. *Genetics* 150(1):227-237.
- 353 42. Bordenstein SR, O'Hara FP, & Werren JH (2001) *Wolbachia*-induced incompatibility precedes  
354 other hybrid incompatibilities in *Nasonia*. *Nature* 409(6821):707-710.

- 355 43. Brucker RM & Bordenstein SR (2012) Speciation by symbiosis. *Trends in ecology & evolution*  
356 27(8):443-451.
- 357 44. Zabalou S, *et al.* (2004) Natural *Wolbachia* infections in the *Drosophila yakuba* species complex  
358 do not induce cytoplasmic incompatibility but fully rescue the wRi modification. *Genetics*  
359 167(2):827-834.
- 360 45. Bourtzis K, Dobson SL, Braig HR, & O'Neill SL (1998) Rescuing *Wolbachia* have been overlooked.  
361 *Nature* 391(6670):852-853.
- 362 46. Casiraghi M, Anderson TJ, Bandi C, Bazzocchi C, & Genchi C (2001) A phylogenetic analysis of  
363 filarial nematodes: comparison with the phylogeny of *Wolbachia* endosymbionts. *Parasitology*  
364 122 Pt 1:93-103.
- 365 47. Yu NY, *et al.* (2010) PSORTb 3.0: improved protein subcellular localization prediction with  
366 refined localization subcategories and predictive capabilities for all prokaryotes. *Bioinformatics*  
367 (*Oxford, England*) 26(13):1608-1615.
- 368 48. Hofmann K (1993) TMbase-A database of membrane spanning proteins segments. *Biol. Chem.*  
369 *Hoppe-Seyler* 374:166.
- 370 49. Kumar S, Stecher G, & Tamura K (2016) MEGA7: Molecular Evolutionary Genetics Analysis  
371 Version 7.0 for Bigger Datasets. *Molecular biology and evolution* 33(7):1870-1874.
- 372 50. Liang H, Zhou W, & Landweber LF (2006) SWAKK: a web server for detecting positive selection in  
373 proteins using a sliding window substitution rate analysis. *Nucleic Acids Res* 34(Web Server  
374 issue):W382-384.
- 375 51. Steinway SN, Dannenfels R, Laucius CD, Hayes JE, & Nayak S (2010) JCoDA: a tool for detecting  
376 evolutionary selection. *BMC Bioinformatics* 11:284.

377

378

379 **Figure Legends:**

380 **Fig. 1. *cifA* rescues cytoplasmic incompatibility when it is highly expressed throughout oogenesis. (A)**

381 Hatch rate assays were conducted with transgenic expression of *cifA* under the control of *nos*-GAL4-  
382 *tubulin* or MTD-GAL4 drivers. Each dot represents a replicate. Rescue occurred only under MTD-GAL4  
383 expression. Horizontal dotted lines from top to bottom separate cross types with CI, *cifA* expression, and  
384 rescue. *Wolbachia* infections are represented by filled sex symbols and expressed genes are noted to the  
385 right of the corresponding sex. n=27-59 for each experimental cross across two experiments (both shown).  
386 Vertical bars represent medians, and letters to the right indicate significant differences based on  $\alpha=0.05$   
387 calculated by Kruskal-Wallis and Dunn's test for multiple comparisons. (B) Expression fold change of *cifA*  
388 relative to the *Drosophila* housekeeping gene Rp49 was determined on a subset of abdomens from female  
389 expressing *cifA* via MTD-GAL4 or *nos*-GAL4-*tubulin* with  $2^{-\Delta\Delta Ct}$ . Horizontal bars represent medians with 95%  
390 confidence intervals, and letters above indicate significance based on a Mann-Whitney test. In both cases,  
391 statistical comparisons are between all groups. Exact p-values are provided in Table S2. Hatch rate  
392 experiments testing expression of *cifA* under MTD-GAL4 or *nos*-GAL4-*tubulin* have been repeated four  
393 and five times respectively.

394 **Fig. 2. Rescue of cytoplasmic incompatibility is specific to *cifA*.** Hatch rate assays were conducted with

395 transgenic expression of *cifA*, *cifB*, and *cifA;B* using the MTD-GAL4 driver for expression throughout  
396 oogenesis. Each dot represents a replicate. *Wolbachia* infections are represented by filled sex symbols  
397 and expressed genes are noted to the right of the corresponding sex. n=11-29 for each experimental cross.  
398 Vertical bars represent medians, and letters to the right indicate significant differences based on  $\alpha=0.05$   
399 calculated by Kruskal-Wallis and Dunn's test for multiple comparisons. Statistical comparisons are  
400 between all groups. Exact p-values are provided in Table S2. Hatch rate experiments testing expression of  
401 *cifA* under MTD-GAL4 have been repeated four times.



402 **Fig. 3. *cifA* rescues embryonic defects caused by cytoplasmic incompatibility.** The number of embryos  
403 with each cytological phenotype resulting from the indicated crosses is shown. All replicate crosses were  
404 conducted in parallel and with sisters from the experiment in Fig 2. *cifA*, *cifB*, and *cifA;B* transgene  
405 expression was under the control of MTD-GAL4. *Wolbachia* infections are represented by filled sex  
406 symbols and expressed genes are noted to the right of the corresponding sex. Letters to the right indicate  
407 significant differences based on  $\alpha=0.05$  calculated by pair-wise chi-square analyses comparing defects (all  
408 shades of red) against normal (blue) with Bonferroni adjusted p-values. Exact p-values are provided in  
409 Table S2. This experiment has been conducted once.

410 **Fig. 4. Ka/Ks sliding window analysis identifies *cifA* regions evolving under negative selection.** A sliding  
411 window analysis of Ka/Ks ratios between *cifA* homologs from *wMel* and *wHa* rejects the neutral  
412 expectation of Ka/Ks = 1 using a 25 amino acid sliding window across most of *cifA*. Strong purifying  
413 selection is observed in several *cifA* regions including the sequence preceding the Catalase-rel domain.  
414 Shaded regions denote previously described protein domain predictions (33).

415

1 **Fig. S1. *cifA* transgene expression in germline stem cells fails to elicit rescue.** Transgene expression of  
2 *cifA*, *cifB*, and *cifA;B* using the *nos*-GAL4-*tubulin* driver does not lead to rescue of cytoplasmic  
3 incompatibility. Each dot represents a replicate. *Wolbachia* infections are represented by filled sex  
4 symbols, and expressed genes are noted to the right of the corresponding sex. n=15-34 for each  
5 experimental cross. Vertical bars represent medians and letters to the right indicate significant differences  
6 based on  $\alpha=0.05$  calculated by Kruskal-Wallis and Dunn's test for multiple comparisons. Statistical  
7 comparisons are between all groups. Exact p-values are provided in Table S2.

8 **Fig. S2. *cifA* does not preferentially rescue one sex over the other.** Surviving offspring from the  
9 experiment displayed in Figure 2 were collected for adult sex ratio counts. There was no significant  
10 difference between any of the crosses. A sex ratio count was not possible for CI crosses due to the low  
11 number of surviving offspring. *Wolbachia* infections are represented by filled sex symbols and expressed  
12 genes are noted to the right of the corresponding sex. n=11-22 for each experimental cross. Vertical bars  
13 represent medians and letters to the right indicate significant differences based on  $\alpha=0.05$  calculated by  
14 Kruskal-Wallis and Dunn's test for multiple comparisons. Statistical comparisons are between all groups.  
15 Exact p-values are provided in Table S2. This experiment was conducted once.

16 **Fig. S3. CifA is a putative cytoplasmic protein. (A)** The PSORTb subcellular protein localization web server  
17 was used on Type I CifA proteins to predict the protein's localization in the *Wolbachia* cell. Predictive  
18 scores above 7.5 are accepted to be sufficient to determine a single location of localization and suggest  
19 that CifA is a cytoplasmic protein. **(B)** The TMpred web server was used to predict transmembrane helices.  
20 TMpred scores exceeding 500 (denoted by horizontal dotted line) are considered significant. TMpred  
21 scores were generated for transmembrane helices spanning from inside-to-outside (i-o) and outside-to-  
22 inside (o-i). Shaded regions denote previously described protein domain predictions (33).

23 **Fig. S4. *cifA* regions evolve under negative selection. (A)** Pairwise codon-based z-tests of selection  
24 suggest that regions of the *cifA* gene are not evolving under the neutral expectation of  $K_a=K_s$ . Values below

25 the diagonal are p-values for where there is a significant departure from neutrality or not. Values above  
26 the diagonal are the difference of  $K_a$ - $K_s$  in which positive values suggest positive selection and negative  
27 values suggest purifying selection. (B) Pairwise Fisher's exact tests of neutrality suggest that *cifA* evolves  
28 under purifying selection. Values below the diagonal are p-values. If the p-value is less than 0.05, then the  
29 null hypothesis of strictly neutral or purifying selection is rejected. If the observed number  
30 of synonymous differences per synonymous site exceeds the number of nonsynonymous differences per  
31 nonsynonymous site then *MEGA* sets  $P = 1$  to indicate purifying selection, rather than positive selection.  
32 (C) SWAKK and JCoDA were used for sliding window analyses of  $K_a/K_s$  ratios between *cifA* homologs of  
33 *wMel* and the bidirectionally incompatible *wHa*. Both programs were performed with 25 amino acid  
34 windows and yield  $K_a/K_s$  ratios evident of strong purifying selection in the N-terminus region preceding  
35 the Catalase-rel domain and weaker purifying selection beyond it. Shaded regions denote previously  
36 described domain predictions (33).

37 **Fig. S5. Fertility is related to strain genotype.** A meta-analysis of all control rescue crosses (infected male  
38 x infected female) without a transgene shows that clutch size and hatch rate are significantly correlated  
39 for both the MTD-GAL4 and *nos-GAL4-tubulin* genotypes ( $r = 0.59$  and  $0.50$  for MTD-GAL4 and *nos-GAL4-*  
40 *tubulin* respectively), but the two strains have different y-intercepts (4.69 to 31.43 and 39.94 to 59.04 for  
41 MTD-GAL4 and *nos-GAL4-tubulin* respectively). Each dot represents a replicate where circles and  
42 diamonds are MTD-GAL4 ( $n=91$ ) and *nos-Gal4-tubulin* ( $n=134$ ) respectively. Vertical dotted lines represent  
43 embryo counts where 99% of clutch sizes with 0% embryo hatch rate are to the left for *nos-GAL4-tubulin*  
44 (left line) and MTD-GAL4 (right line). Correlation was assessed with Spearman Rho. A linear regression  
45 best-fit line is plotted for each genotype. Exact p-values are provided in Table S2.

46 **Fig. S6. Schematic of experimental methodology.** (a) All experimental setups begin with the generation  
47 of the maternal lineage (pink), derived from GAL4 driver lines and collected as virgins and aged for 6-8  
48 days till the peak of their fecundity. (b) The paternal lineage (blue) is setup in a stagger such that the males

49 used in the experiment emerge on the day of the experiment. (c) Flies are crossed in a fashion dependent  
50 on the ultimate intent, and grape-juice agar plates provided and replaced in a similar manner for all  
51 experiments. Sex ratio studies are derived from hatch rate assays.

52

53

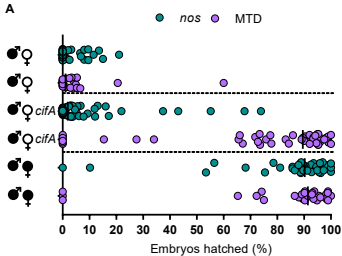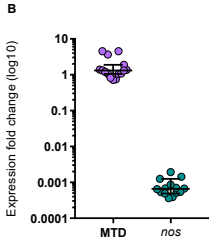



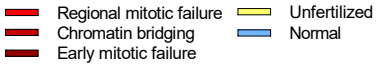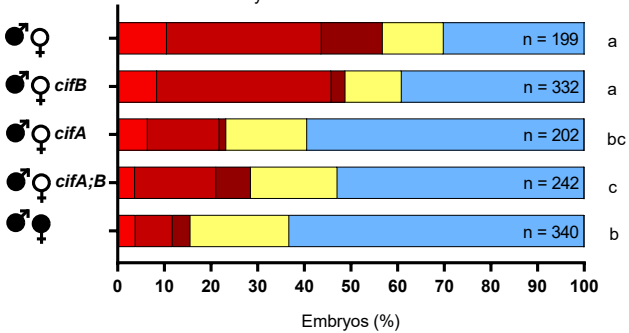

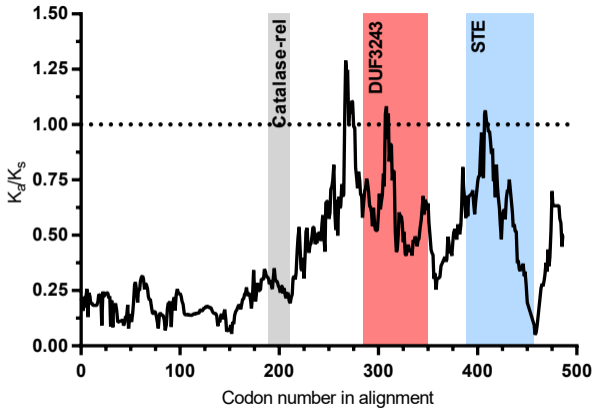



● CI ● Rescue

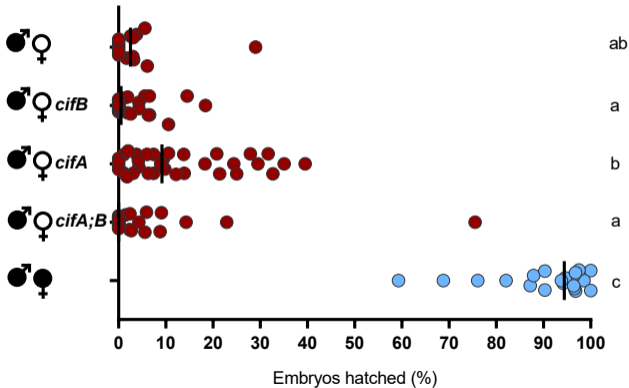

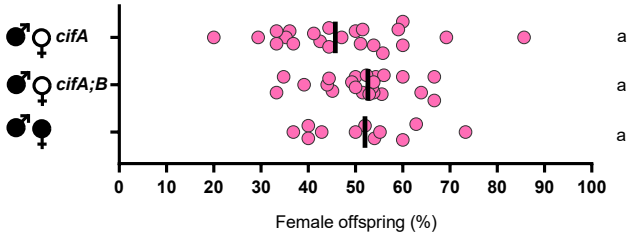

PSORTb subcellular protein localization

|          | Accession      | Cytoplasmic | Cytoplasmic Membrane | Periplasmic | Outer Membrane | Extracellular |
|----------|----------------|-------------|----------------------|-------------|----------------|---------------|
| wMel     | WP_010962721.1 | 8.96        | 0.51                 | 0.26        | 0.01           | 0.26          |
| wRi      | WP_012673191.1 | 8.96        | 0.51                 | 0.26        | 0.01           | 0.26          |
| wRec     | WP_038198916.1 | 8.96        | 0.51                 | 0.26        | 0.01           | 0.26          |
| wSuzi    | WP_044471237.1 | 8.96        | 0.51                 | 0.26        | 0.01           | 0.26          |
| wHa      | WP_015588933.1 | 8.96        | 0.51                 | 0.26        | 0.01           | 0.26          |
| wSol     | AGK87106.1     | 8.96        | 0.51                 | 0.26        | 0.01           | 0.26          |
| wBol 1-b | WP_019236549.1 | 8.96        | 0.51                 | 0.26        | 0.01           | 0.26          |
| wPip     | WP_012481787.1 | 8.96        | 0.51                 | 0.26        | 0.01           | 0.26          |

B

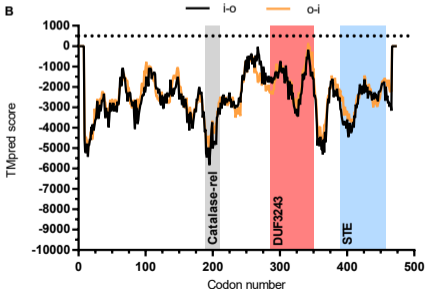

**A** Codon-based test of neutrality

|          | Accession       | wMeI  | wRi   | wRec   | wSuzi  | wHa    | wSol   | wBol 1-b | wPip   |
|----------|-----------------|-------|-------|--------|--------|--------|--------|----------|--------|
| wMeI     | NC_002978       |       | 2.241 | -0.422 | 1.734  | -7.316 | -7.323 | -6.388   | -6.721 |
| wRi      | NC_012416       | 0.027 |       | 0.315  | 1.416  | -7.355 | -7.361 | -6.426   | -6.759 |
| wRec     | NZ_JQAM01000018 | 0.673 | 0.754 |        | -0.161 | -7.205 | -7.211 | -6.277   | -6.609 |
| wSuzi    | NZ_CAOU02000034 | 0.085 | 0.160 | 0.872  |        | -7.412 | -7.419 | -6.484   | -6.816 |
| wHa      | NC_021089       | 0.000 | 0.000 | 0.000  | 0.000  |        | -1.206 | -4.038   | -3.929 |
| wSol     | KC955252        | 0.000 | 0.000 | 0.000  | 0.000  | 0.230  |        | -4.229   | -4.121 |
| wBol 1-b | NZ_CAQH01000056 | 0.000 | 0.000 | 0.000  | 0.000  | 0.000  | 0.000  |          | -1.603 |
| wPip     | NC_010981       | 0.000 | 0.000 | 0.000  | 0.000  | 0.000  | 0.000  | 0.112    |        |

**B** Fisher's exact test of neutrality

|          | Accession       | wMeI  | wRi   | wRec  | wSuzi | wHa   | wSol  | wBol 1-b | wPip |
|----------|-----------------|-------|-------|-------|-------|-------|-------|----------|------|
| wMeI     | NC_002978       |       |       |       |       |       |       |          |      |
| wRi      | NC_012416       | 0.297 |       |       |       |       |       |          |      |
| wRec     | NZ_JQAM01000018 | 1.000 | 0.618 |       |       |       |       |          |      |
| wSuzi    | NZ_CAOU02000034 | 0.483 | 0.616 | 1.000 |       |       |       |          |      |
| wHa      | NC_021089       | 1.000 | 1.000 | 1.000 | 1.000 |       |       |          |      |
| wSol     | KC955252        | 1.000 | 1.000 | 1.000 | 1.000 | 1.000 |       |          |      |
| wBol 1-b | NZ_CAQH01000056 | 1.000 | 1.000 | 1.000 | 1.000 | 1.000 | 1.000 |          |      |
| wPip     | NC_010981       | 1.000 | 1.000 | 1.000 | 1.000 | 1.000 | 1.000 | 1.000    |      |

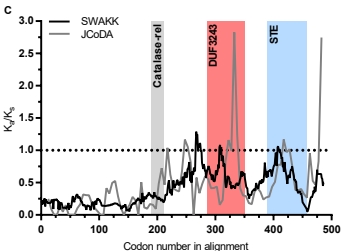

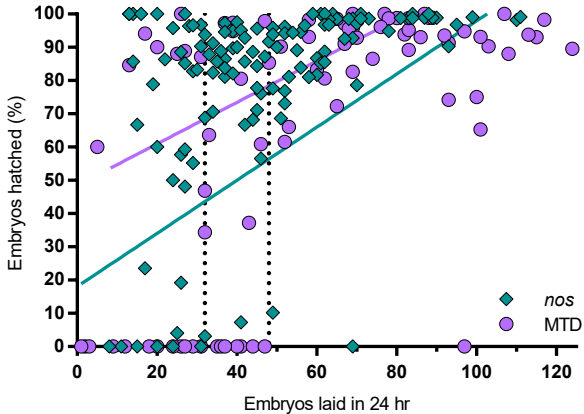

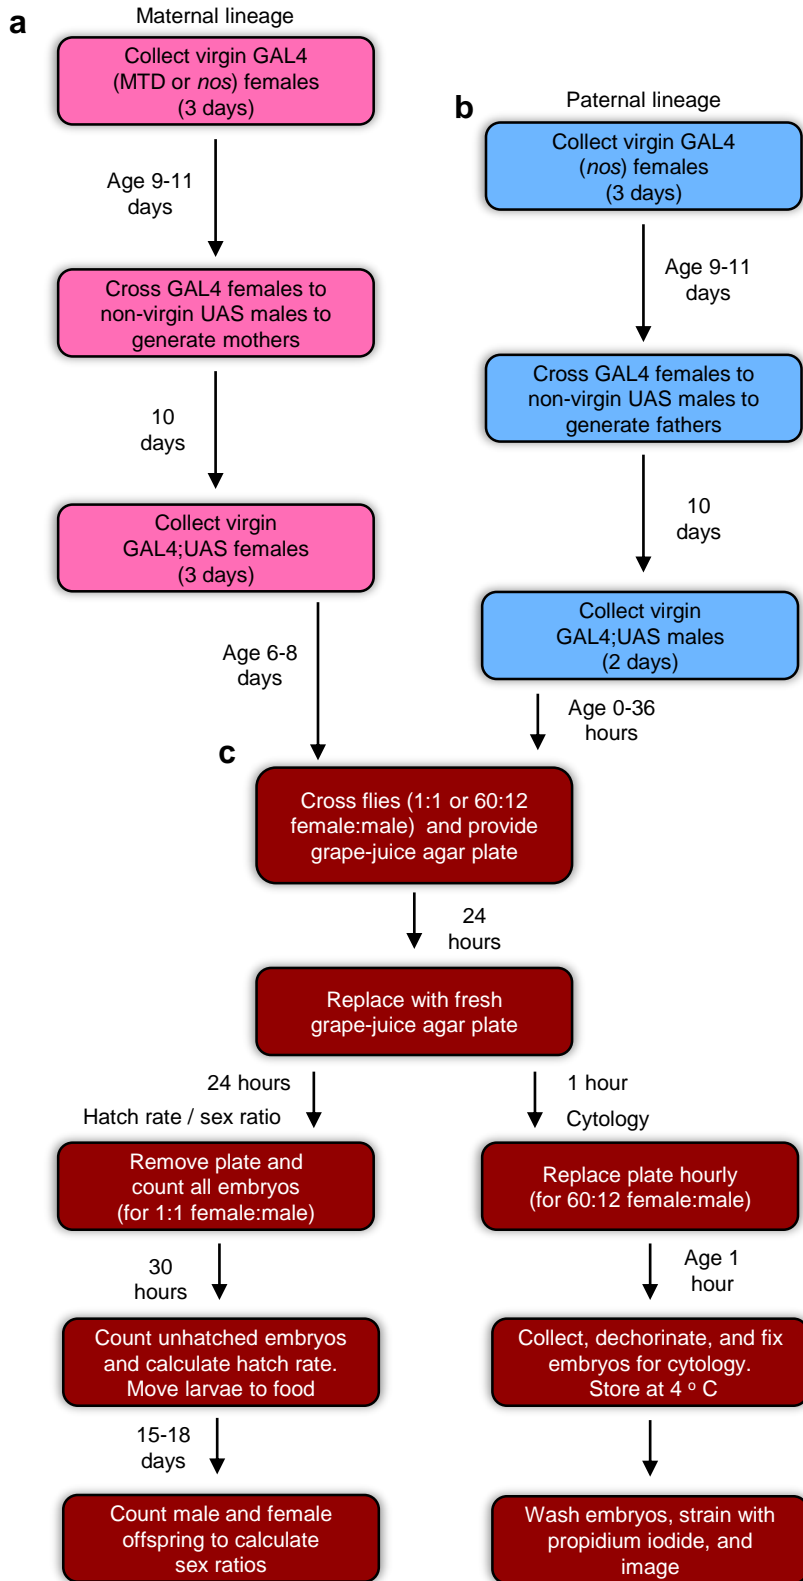

| <b>Table S1. Primers used in this study for RT-qPCR (Fig 1B) or for <i>Wolbachia</i> infection checks.</b> |                         |                            |
|------------------------------------------------------------------------------------------------------------|-------------------------|----------------------------|
| <b>Primer</b>                                                                                              | <b>Sequence</b>         | <b>Product Length (bp)</b> |
| Rp49_F                                                                                                     | CGGTTACGGATCGAACAAAGC   | 154                        |
| Rp49_R                                                                                                     | CTTGCGCTTCTTGAGGAGA     |                            |
| cifA opt_F                                                                                                 | CCCGCTATTGCATCACAGGA    | 186                        |
| cifA opt_R                                                                                                 | CGCGGTTCGATCCAAAAATCG   |                            |
| Wolb_F                                                                                                     | GAAGATAATGACGGTACTCAC   | 990                        |
| Wolb_R3                                                                                                    | GTCAGTATCCCACTTTAAATAAC |                            |
| F = forward primer, R = reverse primer.                                                                    |                         |                            |

| <b>Table S2. P-values associated with all statistical comparisons made in main and extended data figures.</b> |                                                                |                   |                                       |
|---------------------------------------------------------------------------------------------------------------|----------------------------------------------------------------|-------------------|---------------------------------------|
| <b>Figure</b>                                                                                                 | <b>Comparison</b>                                              | <b>p-value</b>    | <b>Test</b>                           |
| Fig. 1A                                                                                                       | [M;+]nos;wt x [F;-]MTD;wt vs. [M;+]nos;wt x [F;-]MTD;cifA      | <b>&lt;0.0001</b> | Kruskal Wallis with Dunn's correction |
|                                                                                                               | [M;+]nos;wt x [F;-]MTD;wt vs. [M;+]nos;wt x [F;+]MTD;wt        | <b>&lt;0.0001</b> | Kruskal Wallis with Dunn's correction |
|                                                                                                               | [M;+]nos;wt x [F;-]MTD;wt vs. [M;+]nos;wt x [F;-]nos;wt        | >0.9999           | Kruskal Wallis with Dunn's correction |
|                                                                                                               | [M;+]nos;wt x [F;-]MTD;wt vs. [M;+]nos;wt x [F;-]nos;cifA      | >0.9999           | Kruskal Wallis with Dunn's correction |
|                                                                                                               | [M;+]nos;wt x [F;-]MTD;wt vs. [M;+]nos;wt x [F;+]nos;wt        | <b>&lt;0.0001</b> | Kruskal Wallis with Dunn's correction |
|                                                                                                               | [M;+]nos;wt x [F;-]MTD;cifA vs. [M;+]nos;wt x [F;+]MTD;wt      | >0.9999           | Kruskal Wallis with Dunn's correction |
|                                                                                                               | [M;+]nos;wt x [F;-]MTD;cifA vs. [M;+]nos;wt x [F;-]nos;wt      | <b>&lt;0.0001</b> | Kruskal Wallis with Dunn's correction |
|                                                                                                               | [M;+]nos;wt x [F;-]MTD;cifA vs. [M;+]nos;wt x [F;-]nos;cifA    | <b>&lt;0.0001</b> | Kruskal Wallis with Dunn's correction |
|                                                                                                               | [M;+]nos;wt x [F;-]MTD;cifA vs. [M;+]nos;wt x [F;+]nos;wt      | >0.9999           | Kruskal Wallis with Dunn's correction |
|                                                                                                               | [M;+]nos;wt x [F;+]MTD;wt vs. [M;+]nos;wt x [F;-]nos;wt        | <b>&lt;0.0001</b> | Kruskal Wallis with Dunn's correction |
|                                                                                                               | [M;+]nos;wt x [F;+]MTD;wt vs. [M;+]nos;wt x [F;-]nos;cifA      | <b>&lt;0.0001</b> | Kruskal Wallis with Dunn's correction |
|                                                                                                               | [M;+]nos;wt x [F;+]MTD;wt vs. [M;+]nos;wt x [F;+]nos;wt        | >0.9999           | Kruskal Wallis with Dunn's correction |
|                                                                                                               | [M;+]nos;wt x [F;-]nos;wt vs. [M;+]nos;wt x [F;-]nos;cifA      | >0.9999           | Kruskal Wallis with Dunn's correction |
|                                                                                                               | [M;+]nos;wt x [F;-]nos;wt vs. [M;+]nos;wt x [F;+]nos;wt        | <b>&lt;0.0001</b> | Kruskal Wallis with Dunn's correction |
|                                                                                                               | [M;+]nos;wt x [F;-]nos;cifA vs. [M;+]nos;wt x [F;+]nos;wt      | <b>&lt;0.0001</b> | Kruskal Wallis with Dunn's correction |
| Fig. 1B                                                                                                       | nos-GAL4-tubulin vs. MTD-GAL4 cifA expression                  | <b>&lt;0.0001</b> | Mann-Whitney test                     |
| Fig. 2                                                                                                        | [M;+]nos;wt x [F;-]MTD;wt vs. [M;+]nos;wt x [F;-]MTD;cifA      | <b>0.0379</b>     | Kruskal Wallis with Dunn's correction |
|                                                                                                               | [M;+]nos;wt x [F;-]MTD;wt vs. [M;+]nos;wt x [F;-]MTD;cifB      | >0.9999           | Kruskal Wallis with Dunn's correction |
|                                                                                                               | [M;+]nos;wt x [F;-]MTD;wt vs. [M;+]nos;wt x [F;-]MTD;cifA;cifB | <b>0.0038</b>     | Kruskal Wallis with Dunn's correction |
|                                                                                                               | [M;+]nos;wt x [F;-]MTD;wt vs. [M;+]nos;wt x [F;+]MTD;wt        | <b>0.0006</b>     | Kruskal Wallis with Dunn's correction |
|                                                                                                               | [M;+]nos;wt x [F;-]MTD;cifA vs. [M;+]nos;wt x [F;-]MTD;cifB    | <b>0.0058</b>     | Kruskal Wallis with Dunn's correction |



|         |                                                                  |                   |                                             |
|---------|------------------------------------------------------------------|-------------------|---------------------------------------------|
|         | [M;+]nos;wt x [F;-]MTD;cifA vs. [M;+]nos;wt x [F;-]MTD;cifA;cifB | >0.9999           | Kruskal Wallis with Dunn's correction       |
|         | [M;+]nos;wt x [F;-]MTD;cifA vs. [M;+]nos;wt x [F;+]MTD;wt        | 0.5436            | Kruskal Wallis with Dunn's correction       |
|         | [M;+]nos;wt x [F;-]MTD;cifB vs. [M;+]nos;wt x [F;-]MTD;cifA;cifB | <b>0.0004</b>     | Kruskal Wallis with Dunn's correction       |
|         | [M;+]nos;wt x [F;-]MTD;cifB vs. [M;+]nos;wt x [F;+]MTD;wt        | <b>&lt;0.0001</b> | Kruskal Wallis with Dunn's correction       |
|         | [M;+]nos;wt x [F;-]MTD;cifA;cifB vs. [M;+]nos;wt x [F;+]MTD;wt   | >0.9999           | Kruskal Wallis with Dunn's correction       |
| Fig. 3  | [M;+]nos;wt x [F;-]MTD;wt vs. [M;+]nos;wt x [F;-]MTD;cifA        | <b>0.0010</b>     | Chi-square with bonferroni adjusted p-value |
|         | [M;+]nos;wt x [F;-]MTD;wt vs. [M;+]nos;wt x [F;-]MTD;cifB        | 0.4680            | Chi-square with bonferroni adjusted p-value |
|         | [M;+]nos;wt x [F;-]MTD;wt vs. [M;+]nos;wt x [F;-]MTD;cifA;cifB   | <b>0.0010</b>     | Chi-square with bonferroni adjusted p-value |
|         | [M;+]nos;wt x [F;-]MTD;wt vs. [M;+]nos;wt x [F;+]MTD;wt          | <b>0.0010</b>     | Chi-square with bonferroni adjusted p-value |
|         | [M;+]nos;wt x [F;-]MTD;cifA vs. [M;+]nos;wt x [F;-]MTD;cifB      | <b>0.0010</b>     | Chi-square with bonferroni adjusted p-value |
|         | [M;+]nos;wt x [F;-]MTD;cifA vs. [M;+]nos;wt x [F;-]MTD;cifA;cifB | 1.0000            | Chi-square with bonferroni adjusted p-value |
|         | [M;+]nos;wt x [F;-]MTD;cifA vs. [M;+]nos;wt x [F;+]MTD;wt        | 0.5740            | Chi-square with bonferroni adjusted p-value |
|         | [M;+]nos;wt x [F;-]MTD;cifB vs. [M;+]nos;wt x [F;-]MTD;cifA;cifB | <b>0.0010</b>     | Chi-square with bonferroni adjusted p-value |
|         | [M;+]nos;wt x [F;-]MTD;cifB vs. [M;+]nos;wt x [F;+]MTD;wt        | <b>0.0010</b>     | Chi-square with bonferroni adjusted p-value |
|         | [M;+]nos;wt x [F;-]MTD;cifA;cifB vs. [M;+]nos;wt x [F;+]MTD;wt   | <b>0.0030</b>     | Chi-square with bonferroni adjusted p-value |
| Fig. S1 | [M;+]nos;wt x [F;-]nos;wt vs. [M;+]nos;wt x [F;-]nos;cifA        | 0.1534            | Kruskal Wallis with Dunn's correction       |
|         | [M;+]nos;wt x [F;-]nos;wt vs. [M;+]nos;wt x [F;-]nos;cifB        | >0.9999           | Kruskal Wallis with Dunn's correction       |
|         | [M;+]nos;wt x [F;-]nos;wt vs. [M;+]nos;wt x [F;-]nos;cifA;cifB   | >0.9999           | Kruskal Wallis with Dunn's correction       |
|         | [M;+]nos;wt x [F;-]nos;wt vs. [M;+]nos;wt x [F;+]nos;wt          | <b>&lt;0.0001</b> | Kruskal Wallis with Dunn's correction       |
|         | [M;+]nos;wt x [F;-]nos;cifA vs. [M;+]nos;wt x [F;-]nos;cifB      | <b>0.0204</b>     | Kruskal Wallis with Dunn's correction       |
|         | [M;+]nos;wt x [F;-]nos;cifA vs. [M;+]nos;wt x [F;-]nos;cifA;cifB | <b>0.0306</b>     | Kruskal Wallis with Dunn's correction       |
|         | [M;+]nos;wt x [F;-]nos;cifA vs. [M;+]nos;wt x [F;+]nos;wt        | <b>0.0001</b>     | Kruskal Wallis with Dunn's correction       |
|         | [M;+]nos;wt x [F;-]nos;cifB vs. [M;+]nos;wt x [F;-]nos;cifA;cifB | >0.9999           | Kruskal Wallis with Dunn's correction       |

|                                                                                                                   |                                                                     |                   |                                       |
|-------------------------------------------------------------------------------------------------------------------|---------------------------------------------------------------------|-------------------|---------------------------------------|
|                                                                                                                   | [M;+]nos;wt x [F;-]nos;cifB vs.<br>[M;+]nos;wt x [F;+]nos;wt        | <b>&lt;0.0001</b> | Kruskal Wallis with Dunn's correction |
|                                                                                                                   | [M;+]nos;wt x [F;-]nos;cifA;cifB vs.<br>[M;+]nos;wt x [F;+]nos;wt   | <b>&lt;0.0001</b> | Kruskal Wallis with Dunn's correction |
| Fig. S2                                                                                                           | [M;+]nos;wt x [F;-]MTD;cifA vs.<br>[M;+]nos;wt x [F;-]MTD;cifA;cifB | 0.5209            | Kruskal Wallis with Dunn's correction |
|                                                                                                                   | [M;+]nos;wt x [F;-]MTD;cifA vs.<br>[M;+]nos;wt x [F;+]MTD;wt        | 0.8609            | Kruskal Wallis with Dunn's correction |
|                                                                                                                   | [M;+]nos;wt x [F;-]MTD;cifA;cifB<br>vs. [M;+]nos;wt x [F;+]MTD;wt   | >0.9999           | Kruskal Wallis with Dunn's correction |
| Fig. S5                                                                                                           | Hatch rate vs clutch size (MTD-<br>GAL4)                            | <b>&lt;0.0001</b> | Spearman's Rho                        |
|                                                                                                                   | Hatch rate vs clutch size (nos-<br>GAL4-tubulin)                    | <b>&lt;0.0001</b> | Spearman's Rho                        |
| M = male, F = female, + = <i>Wolbachia</i> infected, - = <i>Wolbachia</i> uninfected, bold p-values = significant |                                                                     |                   |                                       |
